# Supplementary material for: Design-encoded dual shape-morphing and shape-memory in 4D printed polymer parts toward cellularized vascular grafts
Source: Royal Society of Chemistry journal article supplement (doi:10.1039/d4tb00437j), 2024-01-01
Supplement: d4tb00437j1.pdf [file d4tb00437j1.pdf]

## **Supporting Information**

### **Design-encoded Dual Shape-morphing and Shape-memory in 4D Printed Polymer Parts Toward Cellularized Vascular Grafts**

Saswat Choudhury<sup>1</sup>, Akshat Joshi<sup>1</sup>, Vageesh Singh Baghel<sup>2</sup>, GK Ananthasuresh<sup>2</sup>, Sonal  
Asthana<sup>3,4</sup>, Shervanthi Homer-Vanniasinkam<sup>3,5</sup>, Kaushik Chatterjee<sup>1,3</sup>

<sup>1</sup>Department of Bioengineering, Indian Institute of Science, C.V. Raman Avenue, Bangalore,  
India 560012

<sup>2</sup>Department of Mechanical Engineering, Indian Institute of Science, C.V. Raman Avenue,  
Bangalore, India 560012

<sup>3</sup>Department of Materials Engineering, Indian Institute of Science, C.V. Raman Avenue,  
Bangalore, India 560012

<sup>4</sup>Department of Hepatobiliary and Multi-Organ Transplantation Surgery, Aster CMI Hospital,  
Bangalore, India 560024

<sup>5</sup>Department of Mechanical Engineering and Division of Surgery, University College  
London, London, UK

#Corresponding author:

[kchatterje@iisc.ac.in](mailto:kchatterje@iisc.ac.in); +91-80-22933408

## 1. Results

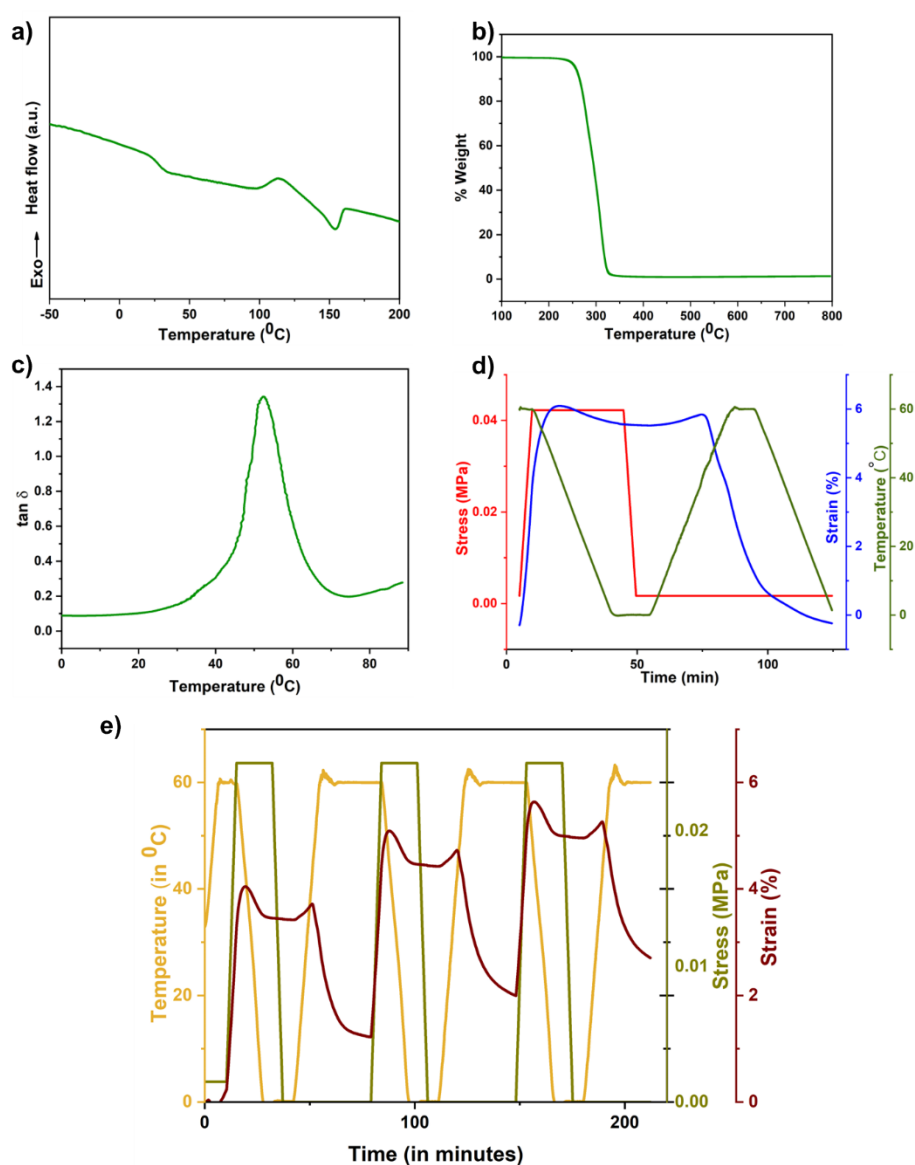

**Figure S1:** Thermal and thermomechanical characterization of PLMC. a) Second heating curve of PLMC in DSC; b) Thermogram showing thermal degradation profile of PLMC in TGA; c) Estimation of  $T_g$  through  $\tan \delta$  profile in DMA; d) Shape memory property quantification in DMA. e) Cyclic shape memory property quantification in DMA.

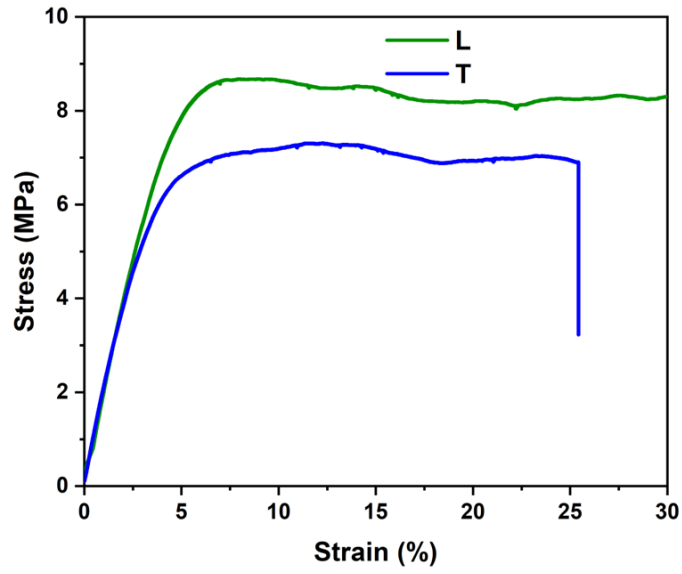

**Figure S2:** Stress-strain profile of as-printed PLMC bars ( $60 \times 6 \times 0.4 \text{ mm}^3$ ) in longitudinal (L) and transverse (T) infill stackings.

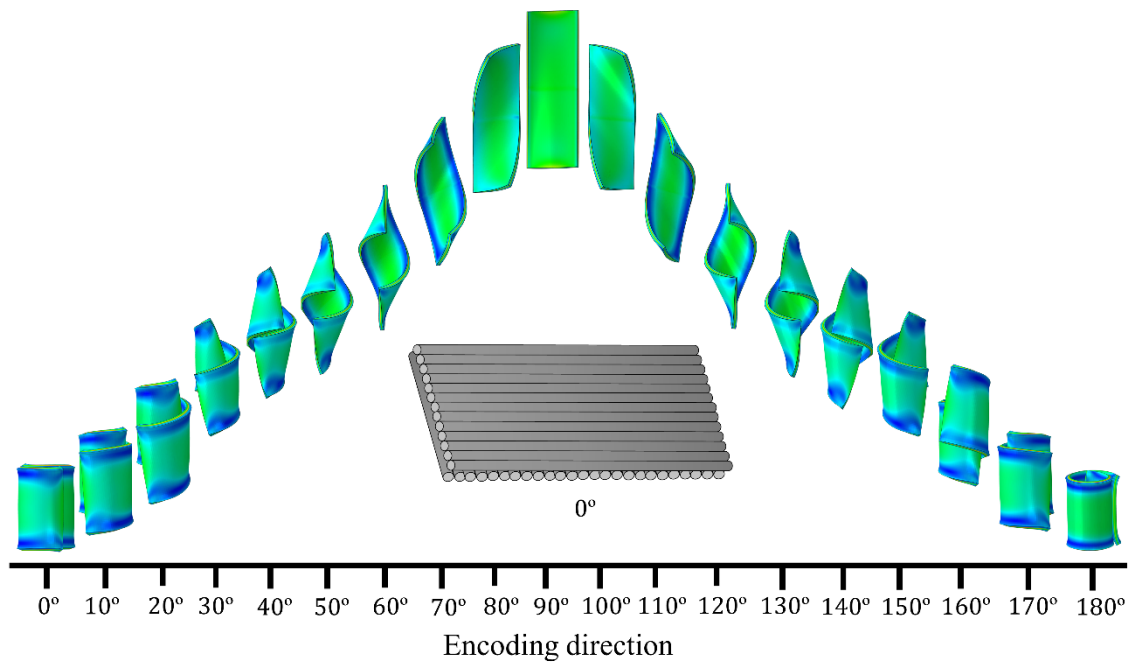

**Figure S3:** Deformation of flat sheets into final shapes with respect to the encoding direction in the bottom layer

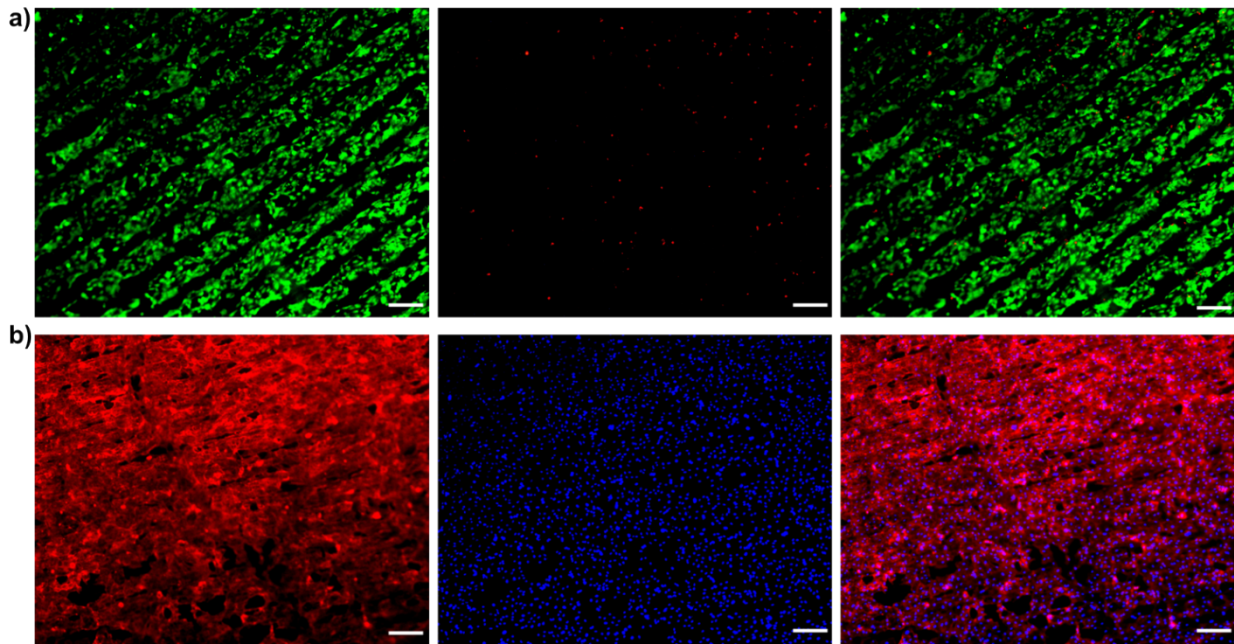

**Figure S4:** Low magnification of HUVECs over PLMC tubes. a) Live-dead staining showing high viability of HUVECs; b) Actin-nuclear staining highlighting high coverage of HUVECs forming monolayers at day 5 (Scale: 200  $\mu\text{m}$ )

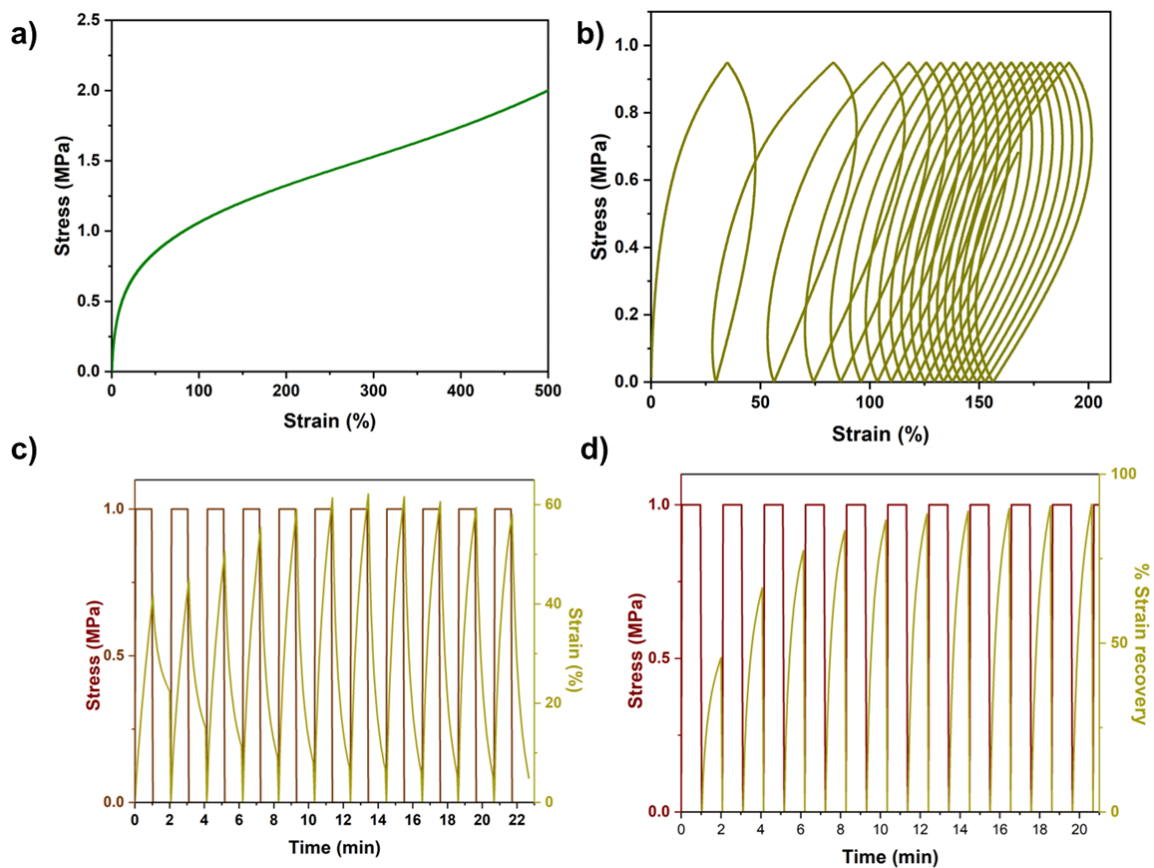

**Figure S5:** Dynamic mechanical testing of 3D printed PLMC bars in uniaxial tension mode at 37°C. a) Stress-strain profile; b) Cyclic stress-strain profiles up to fifteen consecutive cycles; c) Strain profile and d) Strain recovery profile in creep test performed under loading stress of 1 MPa.

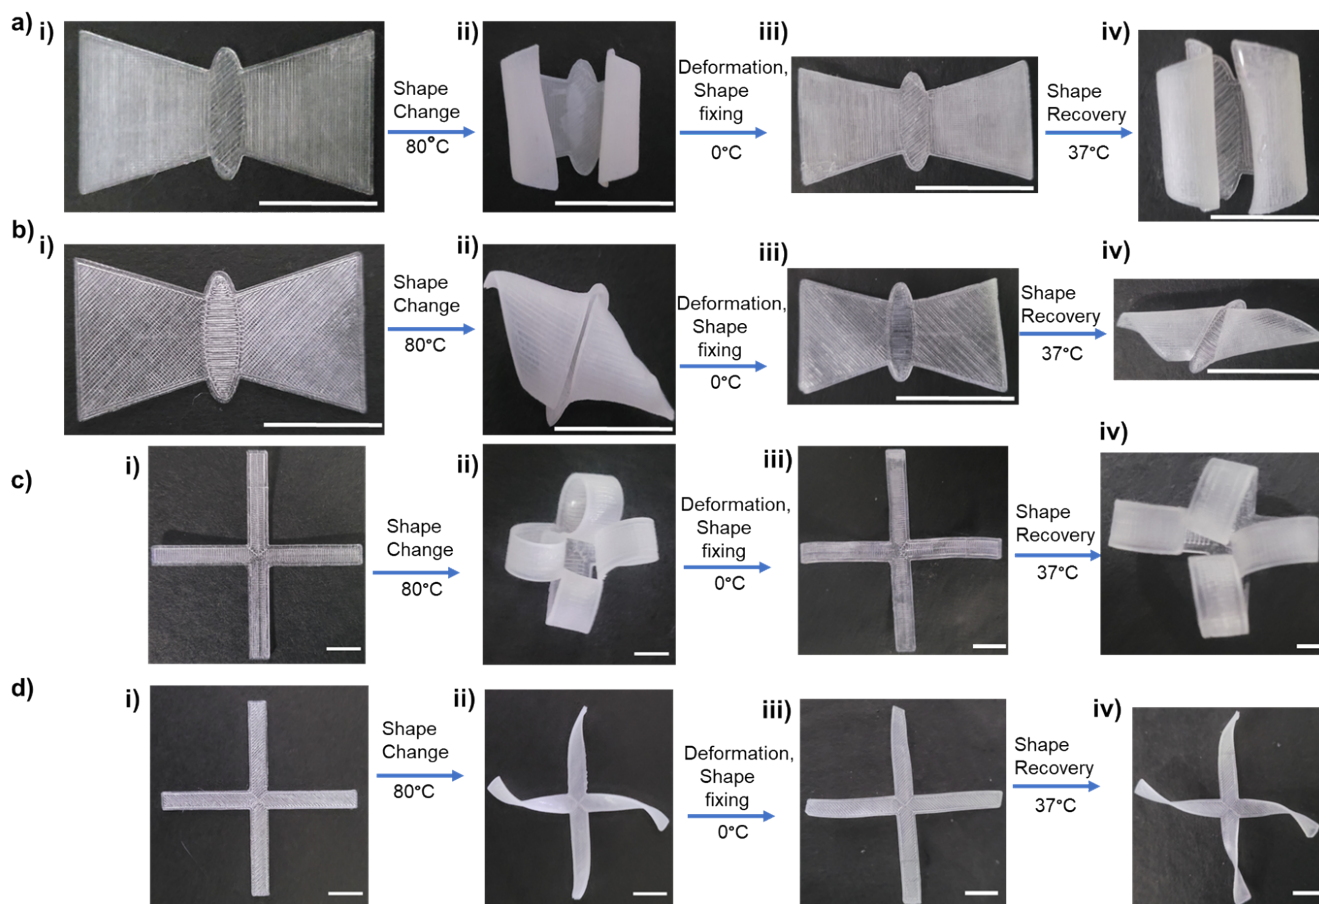

**Figure S6:** Dual shape morphing and shape recovery in different as-printed PLMC structures with varied infill angles. Sequential a) Bending and b) Twisting deformation of a butterfly, flattening and fixing, and recovery to the original bent/ twisted shape. i) As-printed butterfly with a) TLL and b) ( $45^\circ$ ,  $-45^\circ$ ) design encoding; ii) Programmable a) Bending and b) Twisting deformation due to relaxation of residual stresses at  $80^\circ\text{C}$ ; iii) External force aided flattening of the morphed shapes into original shapes; iv) Shape recovery of the flat shapes at  $37^\circ\text{C}$  into original a) bent and b) twisted butterfly shapes. Sequential c) Bending and d) Twisting deformation of a cross shape, flattening and fixing, and recovery to the original bent/ twisted shape. i) As-printed cross with c) TLL and d) ( $45^\circ$ ,  $-45^\circ$ ) design encoding; ii) Programmable c) Bending and d) Twisting deformation due to relaxation of residual stresses at  $80^\circ\text{C}$ ; iii) External force aided flattening of the morphed shapes into original shapes; iv) Shape recovery of the flat shapes at  $37^\circ\text{C}$  into original a) bent and b) twisted cross shapes.

### **Video Captions:**

V1: Complete bending of rectangular flat sheet ( $40 \times 12 \times 0.4 \text{ mm}^3$ ) with TTLL design encoding into hollow tubes

V2: Complete bending of square flat sheet ( $30 \times 30 \times 0.4 \text{ mm}^3$ ) with TTLL design encoding into hollow tubes

V3: Bending deformation of cross shape with TTLL design encoding

V4: Twisting deformation of cross shape with ( $45^\circ$ ,  $-45^\circ$ ) design encoding

V5: Bending deformation of butterfly shape with TTLL design encoding

V6: Twisting deformation of butterfly shape with ( $45^\circ$ ,  $-45^\circ$ ) design encoding

V7: Bending of a Venus flytrap shape with TTLL design encoding

V8: Simultaneous curling and twisting deformations in a single flat sheet with TTLL and ( $45^\circ$ ,  $-45^\circ$ ) design encoding

### **References:**

1. Choudhury, S.; Joshi, A.; Dasgupta, D.; Ghosh, A.; Asthana, S.; Chatterjee, K., 4D Printed Biocompatible Magnetic Composite for Minimally Invasive Deployable Structures. **2022**  
<https://doi.org/10.26434/chemrxiv-2022-dv25j>
